# Supplementary material for: Base-induced multi-state fluorescence of a trefoil-shaped salicylaldehyde azine derivative
Source: Royal Society of Chemistry journal article supplement (doi:10.1039/d1ra02627e), 2021-01-01
Supplement: d1ra02627e1.pdf [file d1ra02627e1.pdf]

## Supporting information

### Base-induced multi-state fluorescence of a trefoil-shaped salicylaldehyde azine derivative

Noriho Taniguchi, Masaya Naito,\* Shinobu Miyagawa, and Yuji Tokunaga\*

*Department of Materials Science and Engineering, Faculty of Engineering, University of Fukui, Bunkyo, Fukui 910-8507, Japan*

#### Table of contents

|                                                                                                                |    |
|----------------------------------------------------------------------------------------------------------------|----|
| 1. <b>Fig. S1</b> Variable-temperature <sup>1</sup> H NMR spectra of <b>1</b>                                  | 2  |
| 2. <b>Fig. S2</b> <sup>1</sup> H NMR spectra of <b>1</b> upon successive addition of NaOH                      | 3  |
| 3. <b>Fig. S3</b> <sup>1</sup> H NMR spectra of <b>4</b> upon successive addition of NaOH                      | 4  |
| 4. <b>Fig. S4</b> <sup>1</sup> H NMR spectra of <b>5</b> upon successive addition of NaOH                      | 5  |
| 5. <b>Fig. S5</b> <sup>1</sup> H NMR spectra of a mixture of <b>1</b> and NaOH upon successive addition of TFA | 6  |
| 6. <b>Fig. S6</b> UV–Vis absorption spectra of <b>4</b> in the presence of NaOH                                | 7  |
| 7. <b>Fig. S7</b> UV–Vis absorption spectra of <b>5</b> in the presence of NaOH                                | 8  |
| 8. <b>Fig. S8</b> <sup>1</sup> H– <sup>1</sup> H COSY NMR spectrum of <b>1</b>                                 | 9  |
| 9. <b>Fig. S9</b> <sup>1</sup> H NMR spectra of <b>1</b> upon successive addition of TEA                       | 10 |
| 10. <b>Fig. S10</b> <sup>1</sup> H NMR spectrum of <b>1</b>                                                    | 11 |
| 11. <b>Fig. S11</b> <sup>13</sup> C NMR spectrum of <b>1</b>                                                   | 12 |

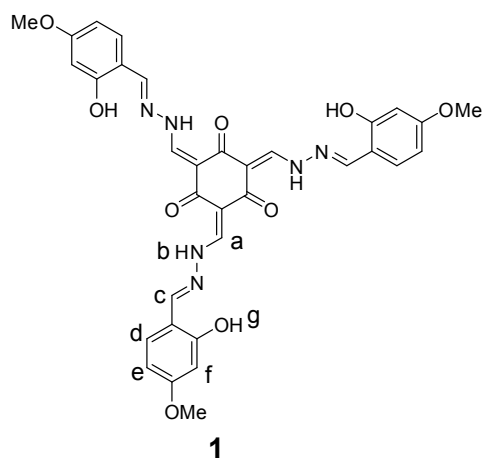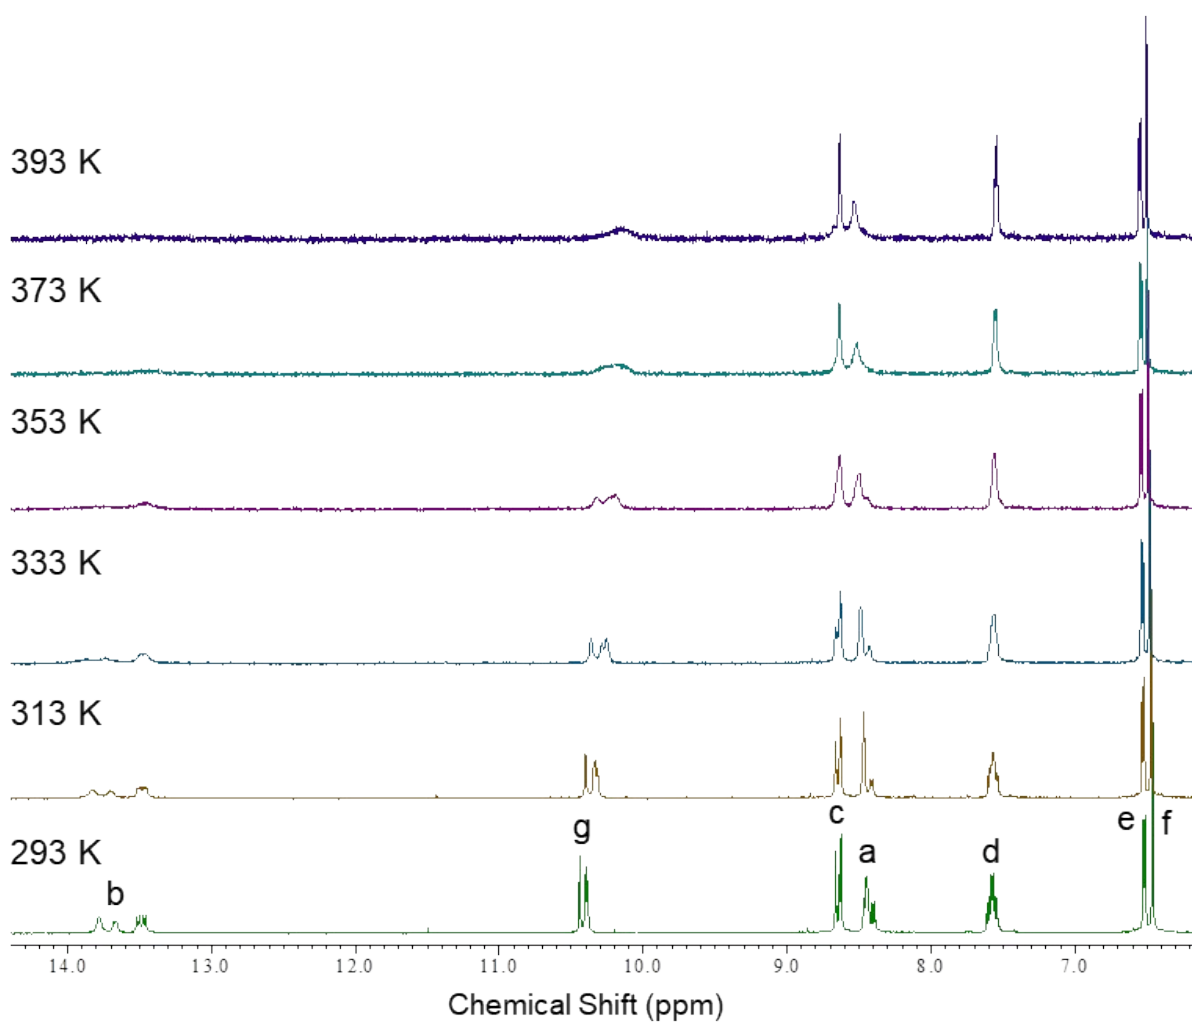

**Fig. S1** Variable-temperature  $^1\text{H}$  NMR spectra (600 MHz,  $\text{DMSO}-d_6$ ) of **1**.

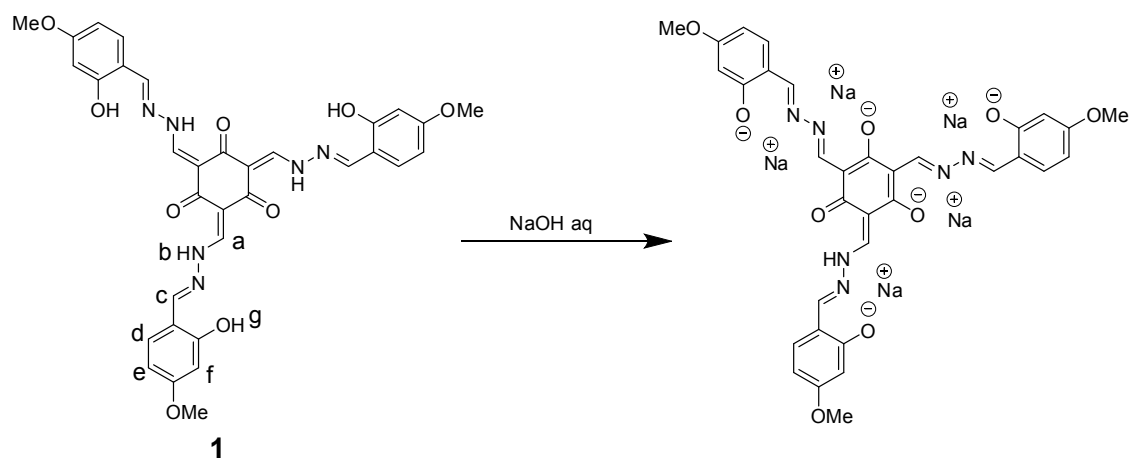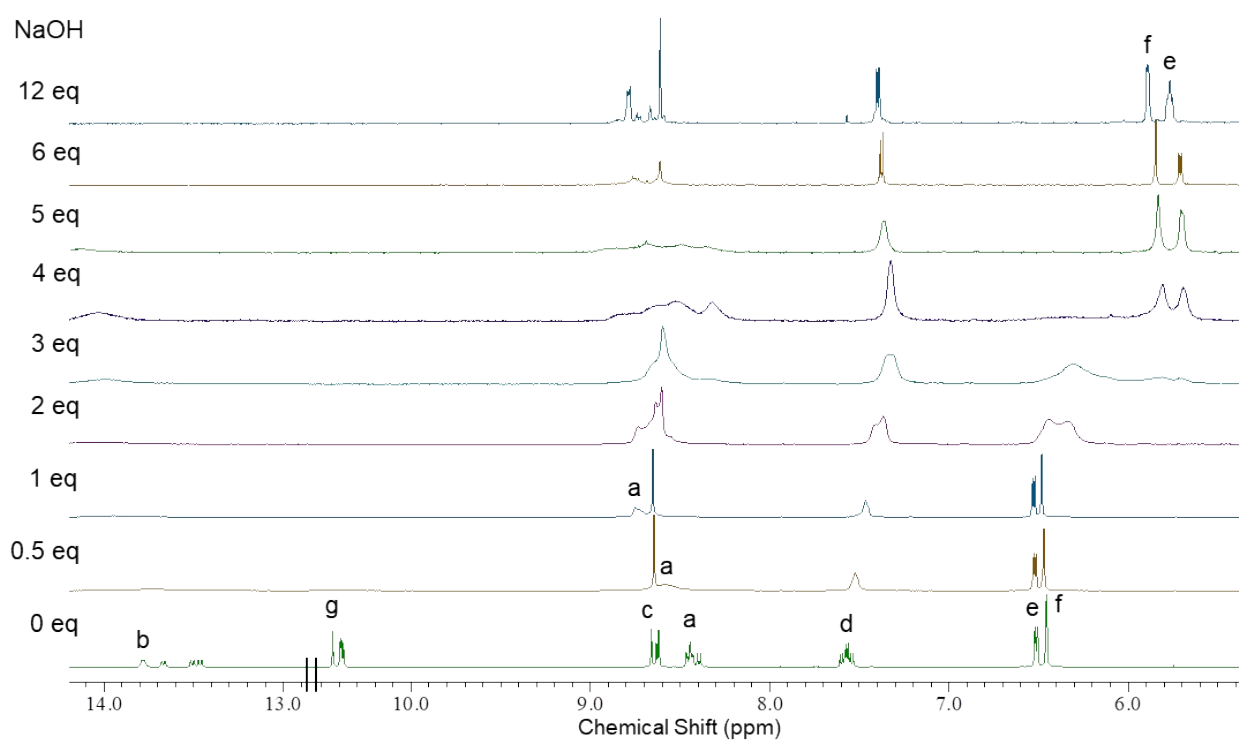

**Fig. S2**  $^1\text{H}$  NMR spectra (600 MHz,  $\text{DMSO-}d_6$ , 295 K) of **1** (5.0 mM) upon successive addition of NaOH (0–12 eq). The partial spectra are presented in Fig. 3.

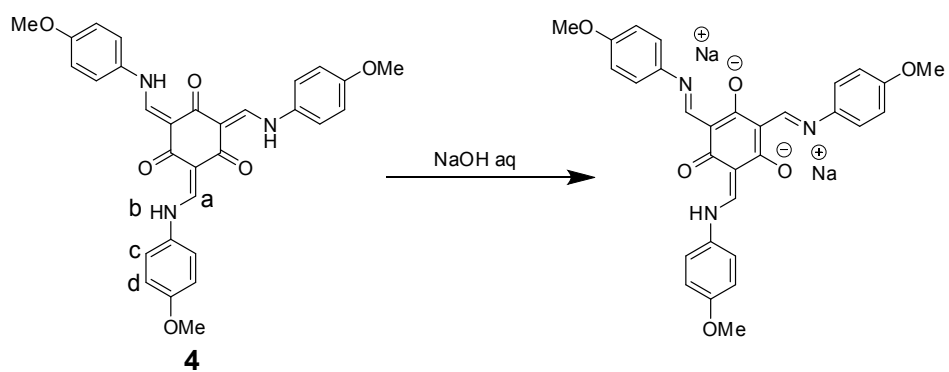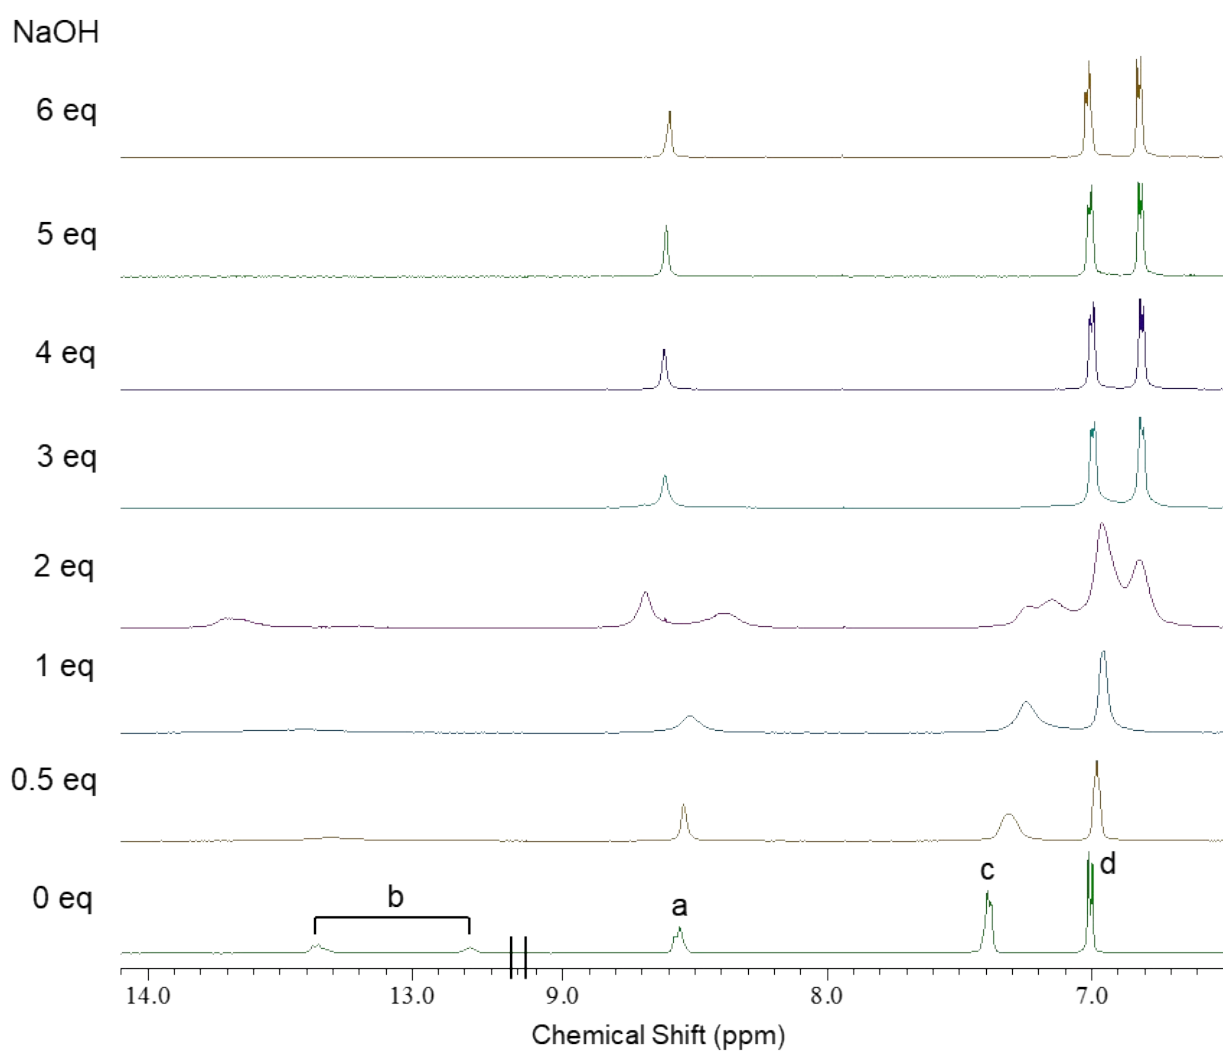

**Fig. S3**  $^1\text{H}$  NMR spectra (600 MHz,  $\text{DMSO-}d_6$ , 295 K) of **4** (5.0 mM) upon successive addition of NaOH (0–6 eq).

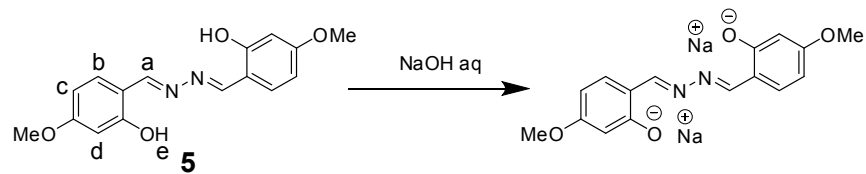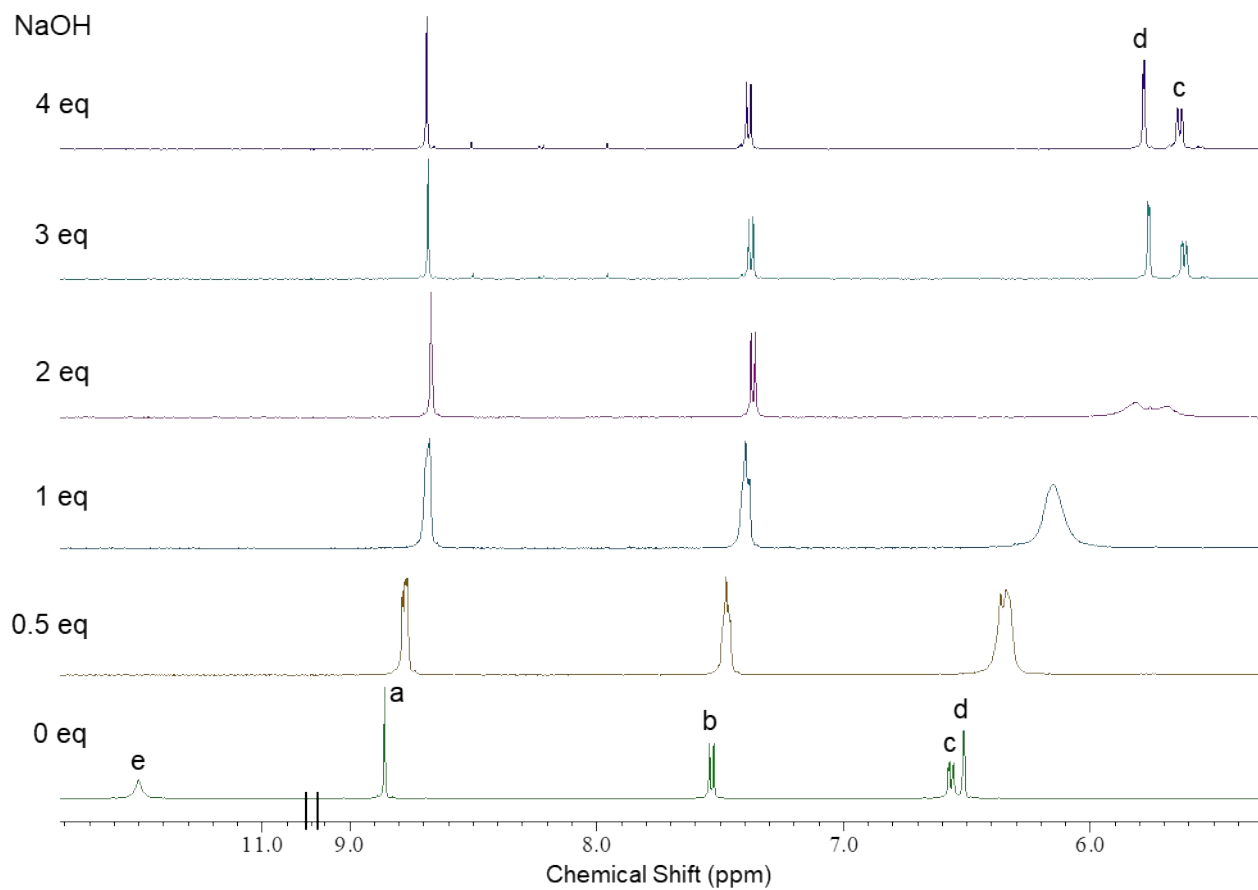

**Fig. S4**  $^1\text{H}$  NMR spectra (600 MHz,  $\text{DMSO-}d_6$ , 295 K) of **5** (5.0 mM) upon successive addition of NaOH (0–4 eq).

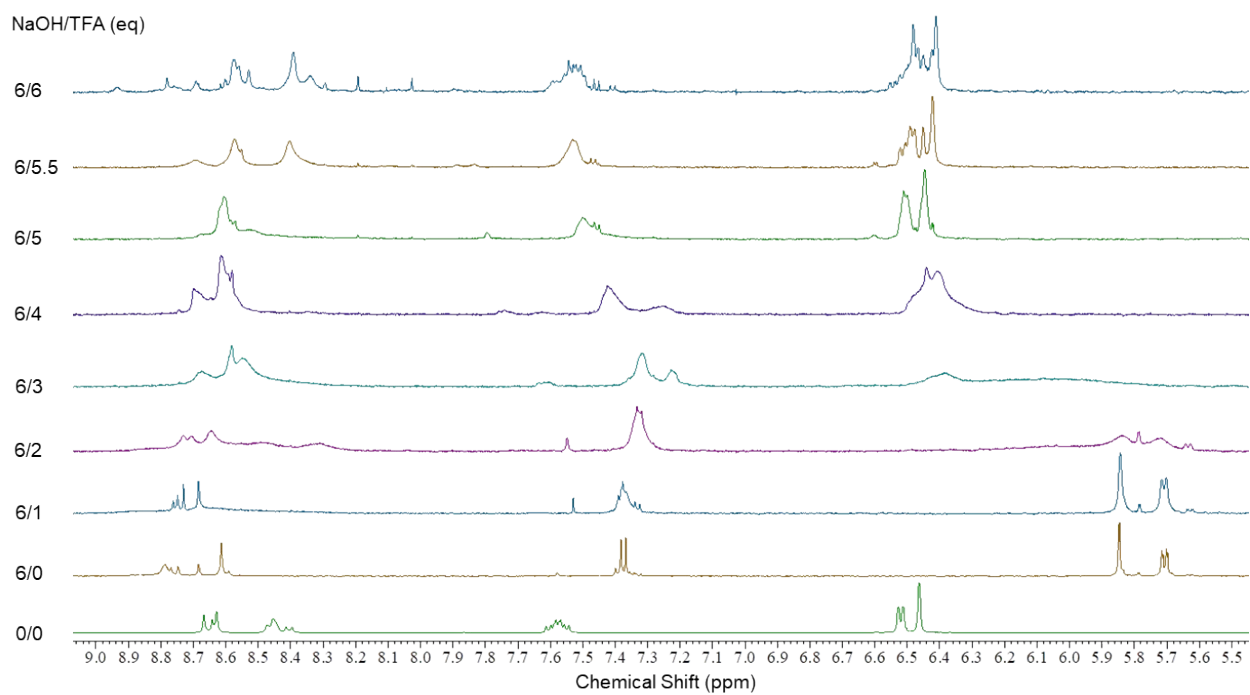

**Fig. S5** <sup>1</sup>H NMR spectra (600 MHz, 295 K) of a mixture of **1** (5.0 mM) and NaOH (6 eq) in DMSO-*d*<sub>6</sub> upon successive addition of TFA (0–6 eq).

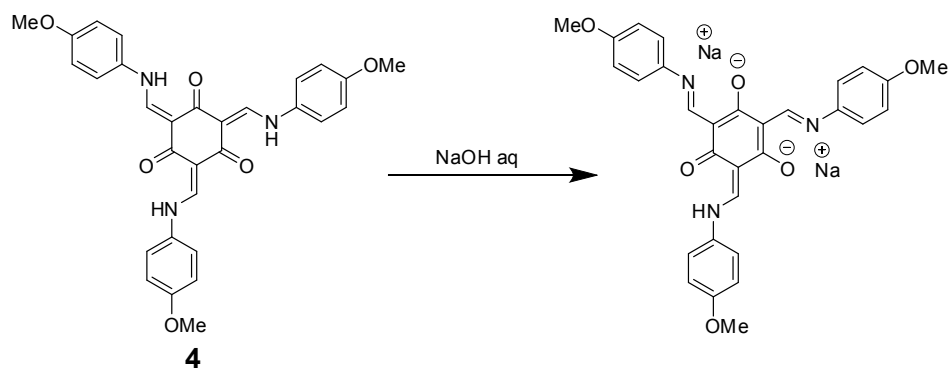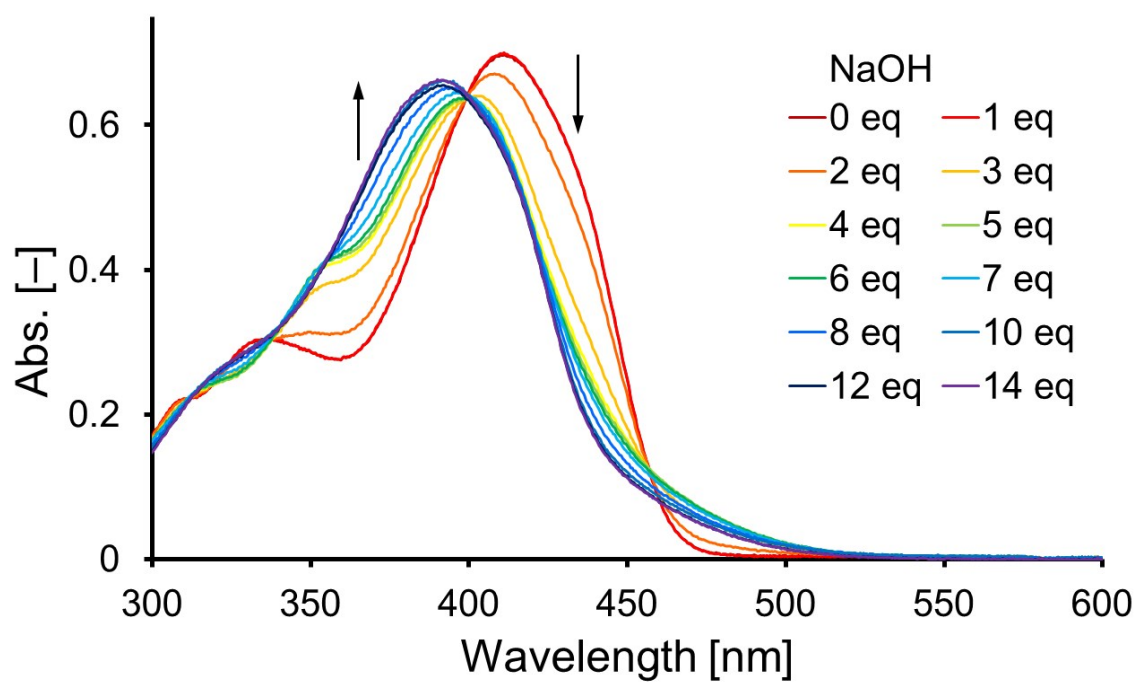

**Fig. S6** UV-Vis absorption spectra of **4** ( $1.0 \times 10^{-1}$  mM) in the presence of NaOH (0–14 eq) [DMSO/H<sub>2</sub>O = 20:1 (v/v);  $d = 1$  mm].

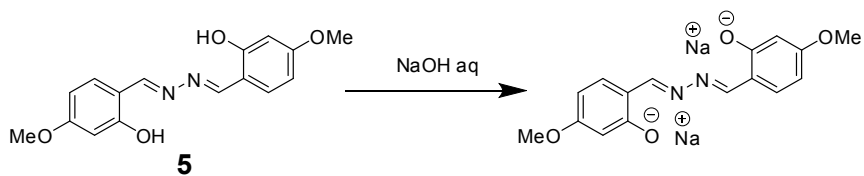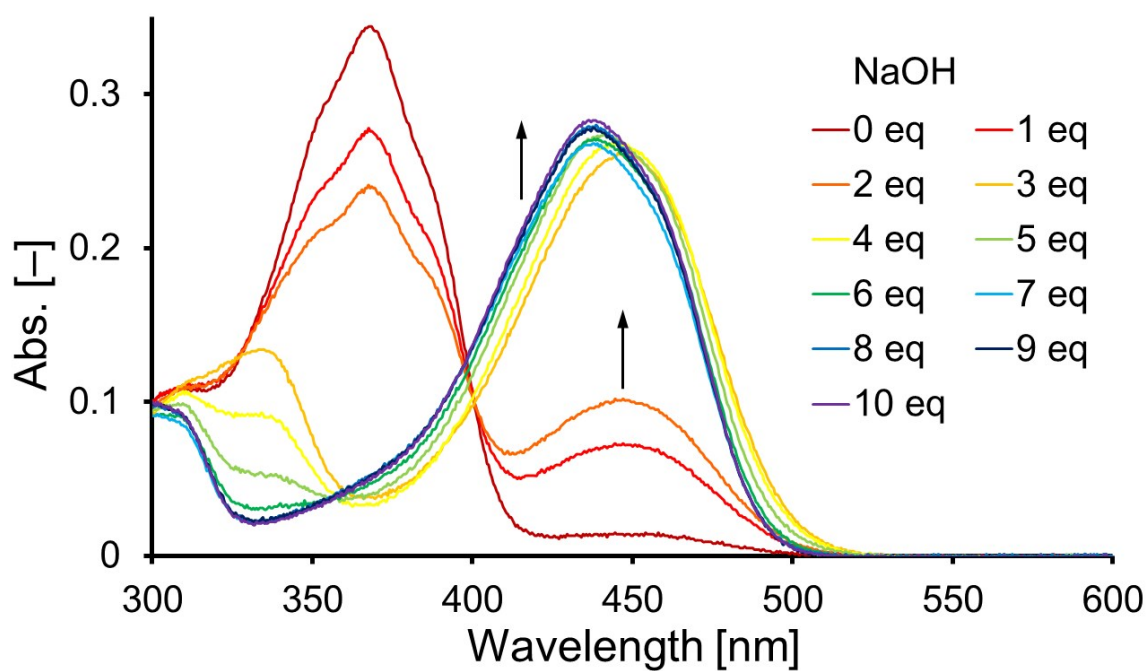

**Fig. S7** UV-Vis absorption spectra of **5** ( $1.0 \times 10^{-1}$  mM) in the presence of NaOH (0–10 eq) [DMSO/H<sub>2</sub>O = 20:1 (v/v);  $d = 1$  mm].



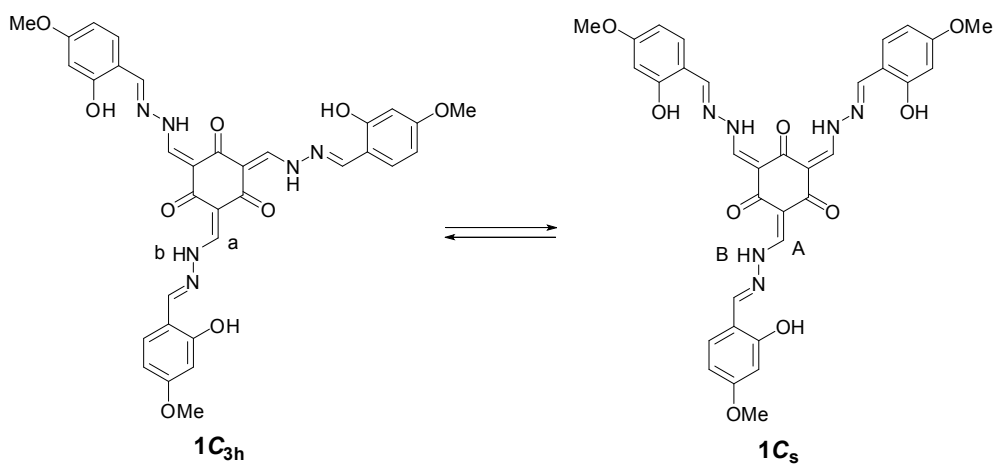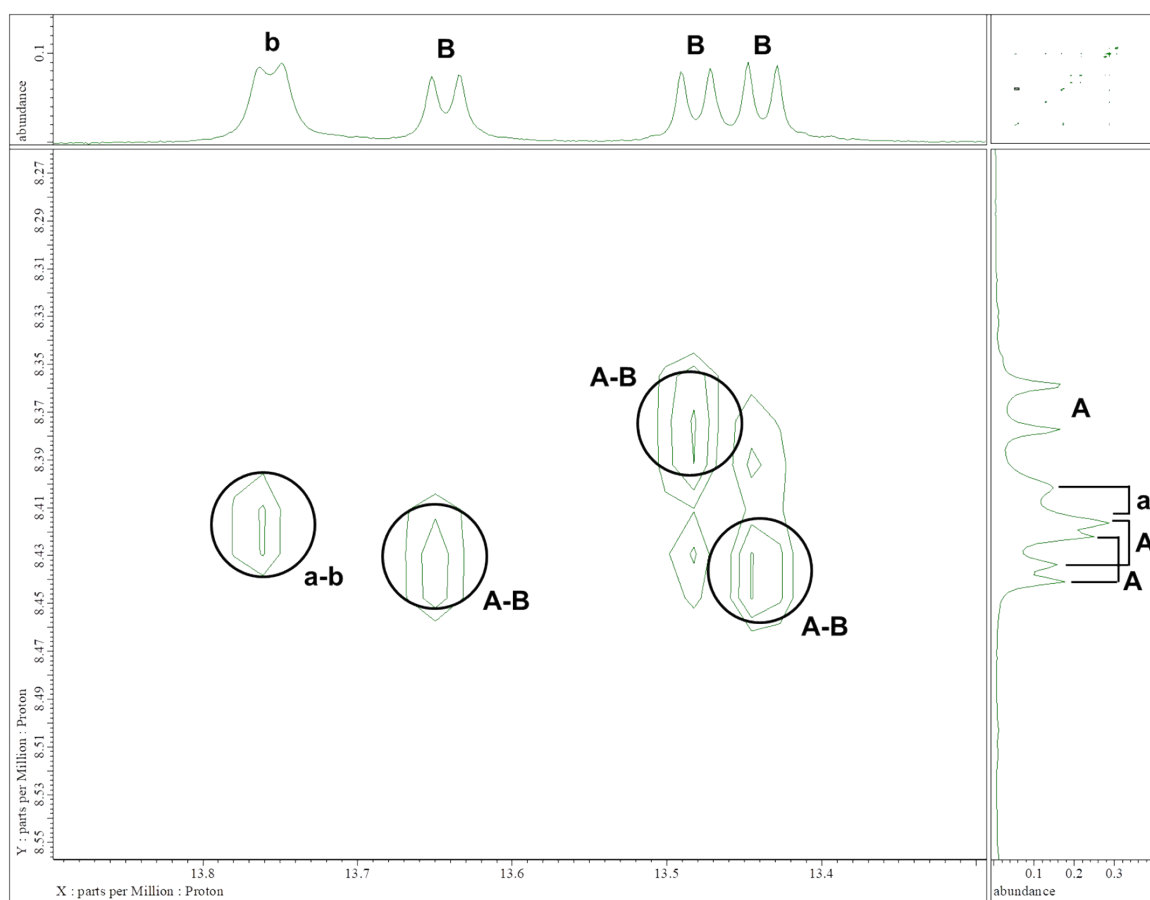

**Fig. S8**  $^1\text{H}$ - $^1\text{H}$  COSY NMR spectrum (600 MHz,  $\text{DMSO-}d_6$ , 295 K) of **1**.

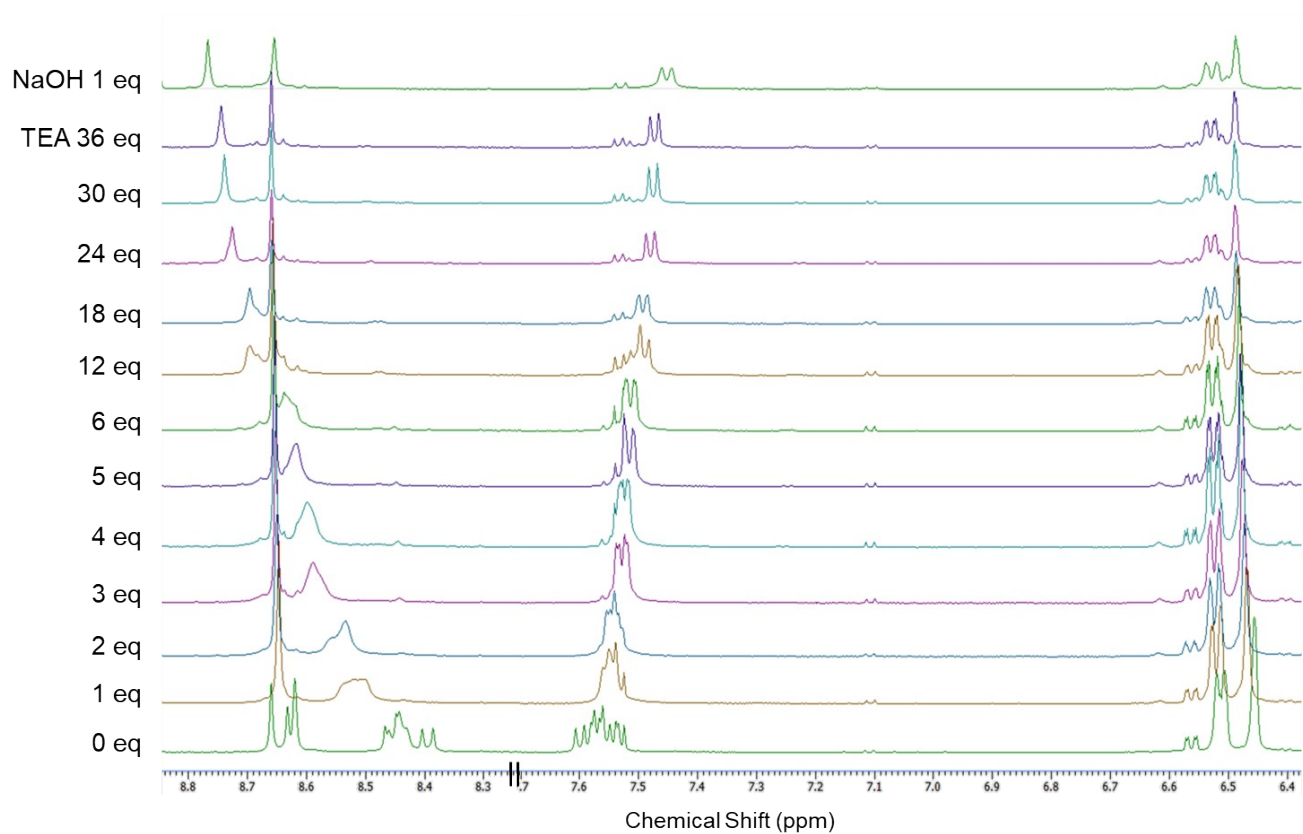

**Fig. S9** <sup>1</sup>H NMR spectra (600 MHz, DMSO-*d*<sub>6</sub>, 295 K) of **1** (5.0 mM) upon successive addition of triethylamine (0–36 eq) and NaOH (1 eq).

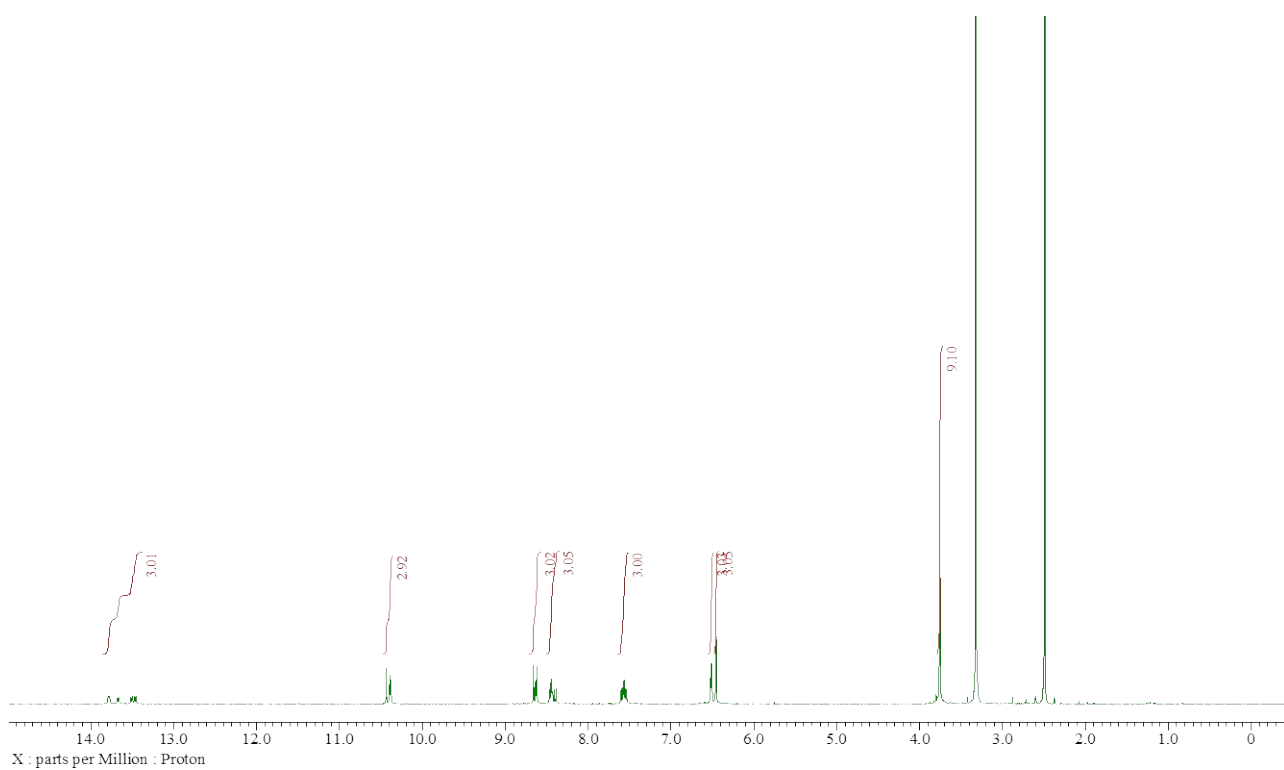

**Fig. S10**  $^1\text{H}$  NMR spectrum (600 MHz,  $\text{DMSO-}d_6$ , 295 K) of **1**.

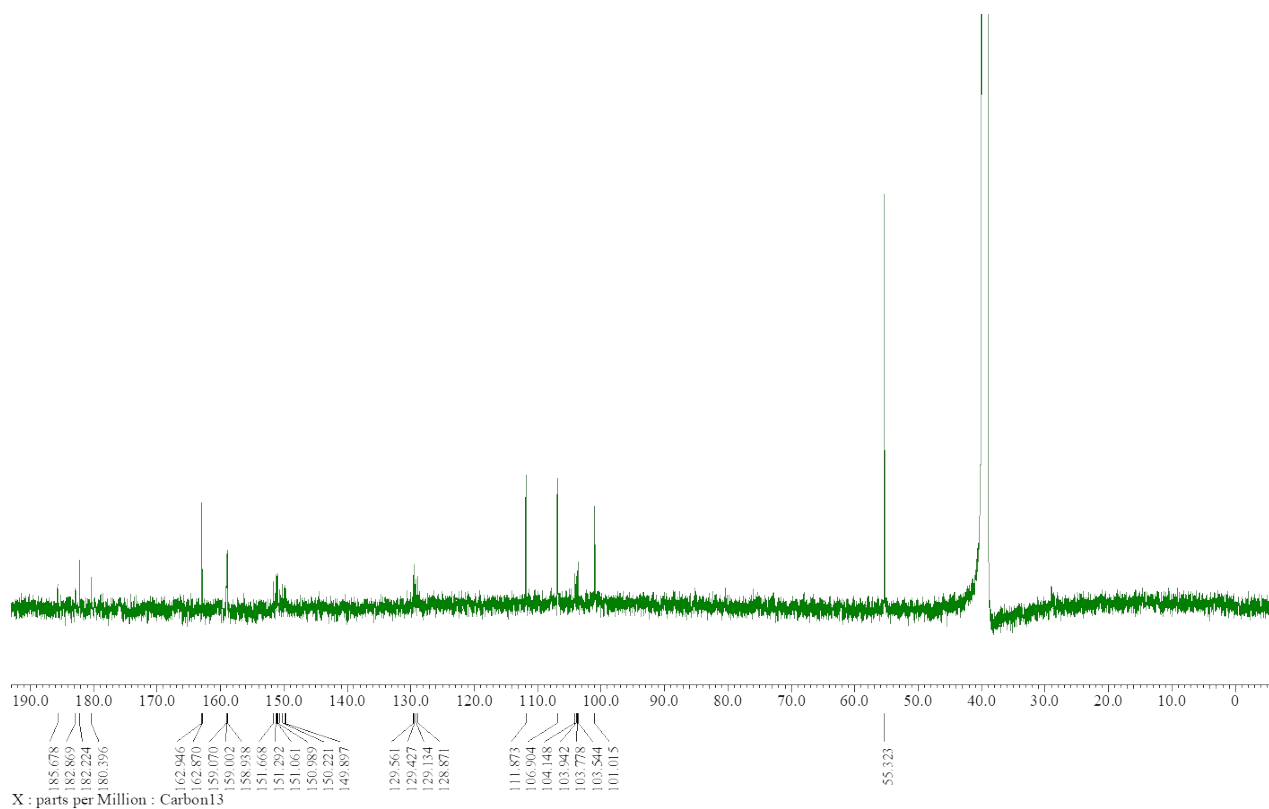

**Fig. S11**  $^{13}\text{C}$  NMR spectrum (150 MHz,  $\text{DMSO-}d_6$ , 295 K) of **1**.
